# Supplementary material
Source: PubMed Central journal article supplement (PMC2858405)

**Supplemental Figure 1. L-selectin shedding by Jurkat cells upon their induced apoptosis.** **A**, Jurkat cells ( $2 \times 10^6/\text{ml}$ ) were either incubated with rhFasL for 30 or 90 min, or they were left untreated, as indicated, for 90 min at  $37^\circ\text{C}$ . **B**, Jurkat cells ( $2 \times 10^6/\text{ml}$ ) were either untreated or treated with rhFasL in the presence or absence of TAPI, as indicated, for 30 min at  $37^\circ\text{C}$ . Relative L-selectin surface expression levels and annexin-V reactivity were determined by flow cytometry. Negative control antibody staining of untreated cells is indicated (Isotype). The x axis = Log 10 fluorescence. The data in panels A and B are representative of at least three independent experiments. **C**, Jurkat cells ( $4 \times 10^6/\text{ml}$ ) were incubated with the anti-Fas antibody CH-11 in the presence or absence of TAPI for 120 min at  $37^\circ\text{C}$ . The presence of soluble L-

selectin in the cell supernatants was determined by ELISA. Data are the mean ( $\pm$  SD) of 3 independent experiments performed in duplicate.

**Supplemental Figure 2. Effects of broad-spectrum protease inhibitors on soluble L-selectin production during later stages of Jurkat cell apoptosis.** Jurkat cells ( $4 \times 10^6$ /ml) were either untreated or incubated with CH-11 in the presence or absence of TAPI and APMSF-HCl, 6-aminocaproic acid, aprotinin, pepstatin A, chymostatin, or leupeptin for 4 hr at 37°C, as described in the Materials and Methods. The presence of soluble L-selectin in the cell supernatants was determined by ELISA. Data are the mean ( $\pm$  SD) of 2 independent experiments performed in duplicate.

Supplemental Figure 1

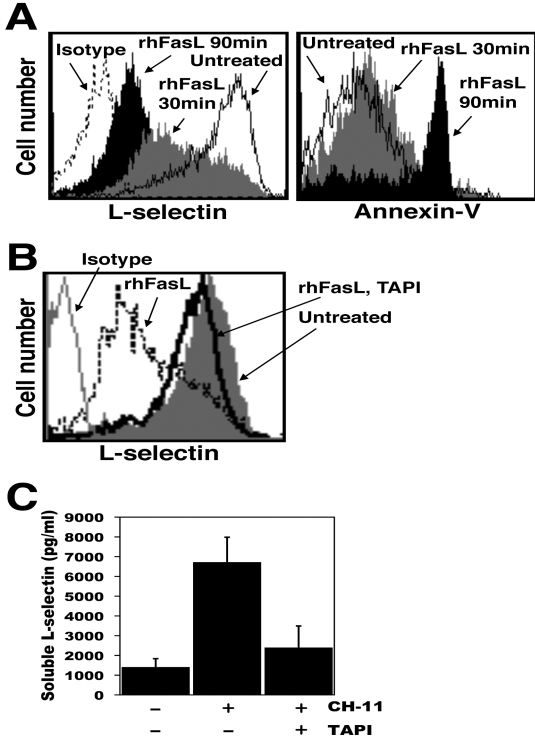

Supplemental Figure 2

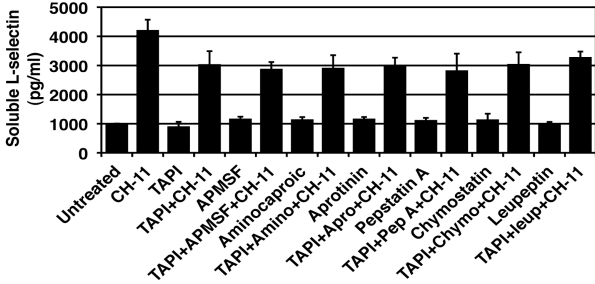

Supplement: NIHMS192776-supplement-01.pdf [file NIHMS192776-supplement-01.pdf]
